# Supplementary material for: Adherence and Persistence to Basal Insulin Among People with Type 2 Diabetes in Europe: A Systematic Literature Review and Meta-analysis
Source: Springer Nature journal article supplement (doi:10.1007/s13300-024-01559-w), 2024-03-23

# Cover page

## Title:

Adherence and persistence to basal insulin among people with type 2 diabetes in Europe - a systematic literature review and meta-analysis

## Authors:

Esteban J Gimeno<sup>1</sup>, Mette Bøgelund<sup>2</sup>, Sara Larsen<sup>3</sup>, Anna Okkels<sup>2</sup>, Signe B Reitzel<sup>2</sup>, Hongye Ren<sup>3</sup>, Domingo Orozco-Beltran<sup>4</sup>

## Affiliations:

<sup>1</sup>Faculty of Medicine, Universidad Europea de Madrid, Madrid, Spain <sup>2</sup>EY Economics, Dirch Passers Allé 36, 2000 Frederiksberg, Denmark, <sup>3</sup>Novo Nordisk, Region North West Europe, Kay Fiskers Plads 10, 7<sup>th</sup> floor, 2300 Copenhagen S, Denmark, <sup>4</sup>Cátedra de Medicina de Familia, Departamento de Medicina Clínica, Universidad Miguel Hernández, Alicante, España

## Corresponding author:

Hongye Ren

Novo Nordisk, Region North West Europe, Kay Fiskers Plads 10, 7<sup>th</sup> floor, 2300 Copenhagen S, Denmark  
[HYRN@novonordisk.com](mailto:HYRN@novonordisk.com)

+45 3075 2419

# Supplementary material

Figure S1: Forest plot for non-persistence within 6 months of basal insulin treatment

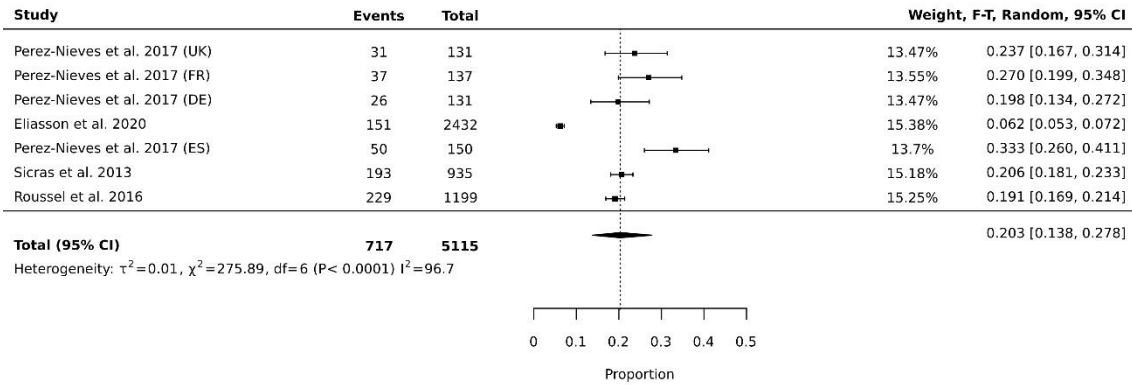

Figure S2: Forest plot for non-persistence within 6 months of basal insulin treatment (register-based data only)

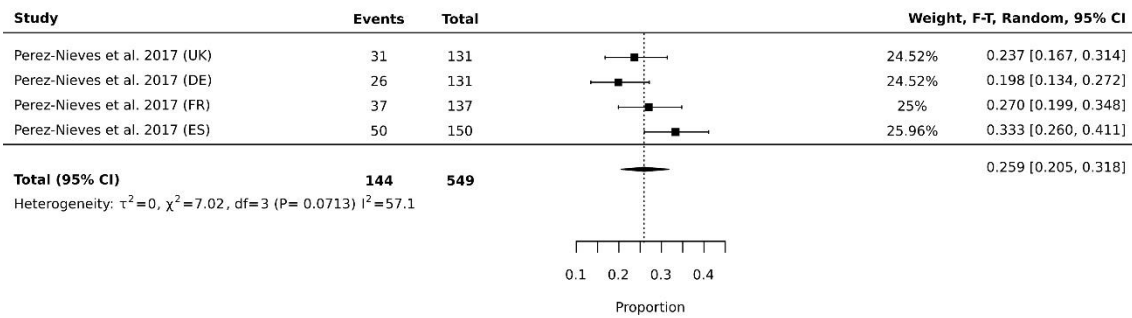

Figure S3: Forest plot for non-persistence within 6 months of basal insulin treatment (based on self-reported data only)

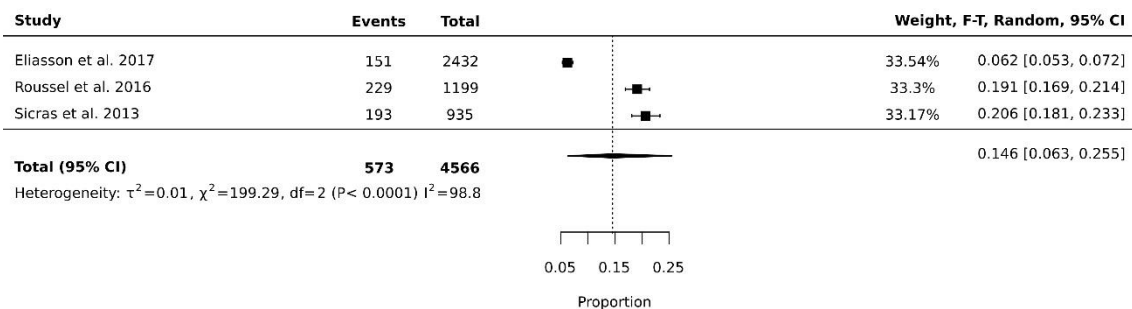

Figure S4: Forest plot for non-persistence within 12 months of basal insulin treatment

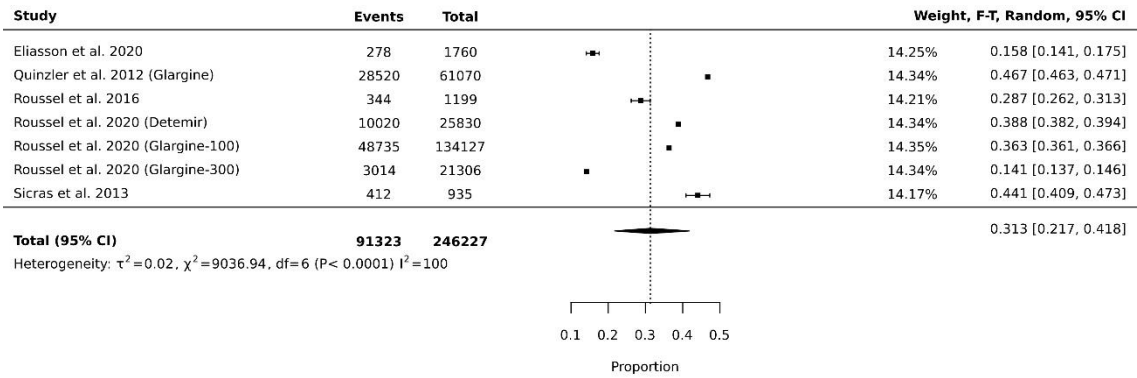

Figure S5: Forest plot for non-persistence within 12 months of basal insuling treatment (excluding NPH)

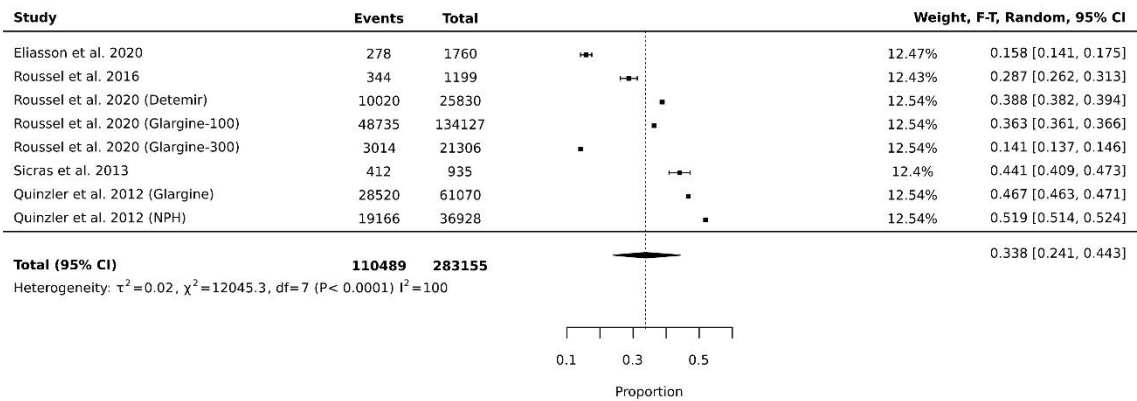

Figure S6: Forest plot for non-persistence within 18 months of basal insulin treatment

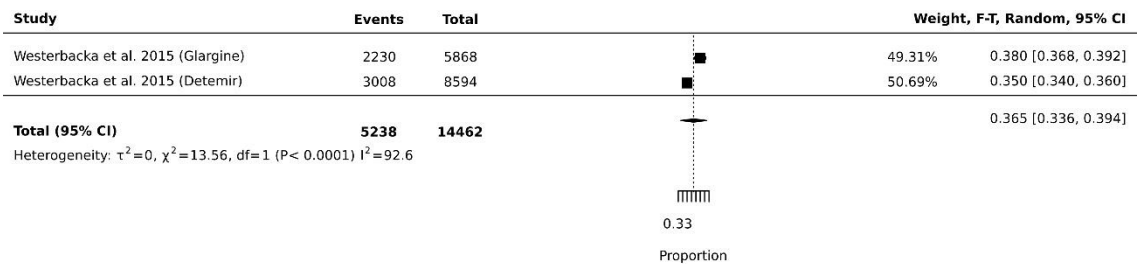

Figure S7: Forest plot for non-persistence within 6 months of basal insulin treatment (excluding Sicras et al. 2013)

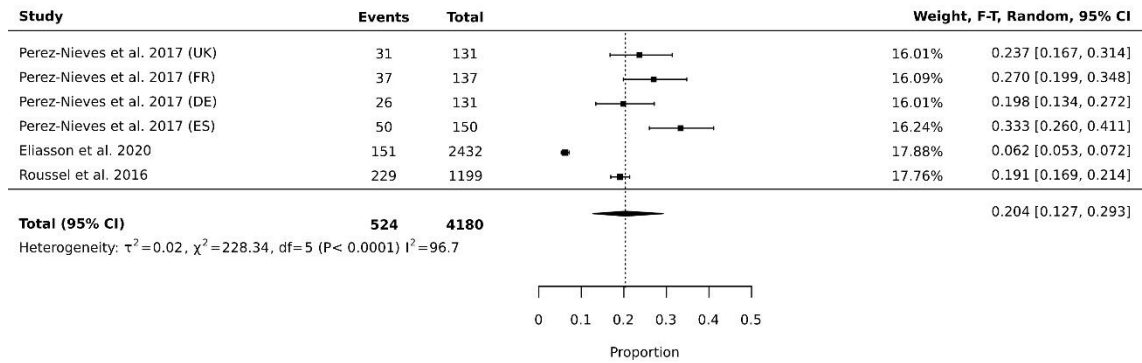

Figure S8: Forest plot for non-persistence within 12 months of basal insulin treatment (excluding Sicras et al. 2013)

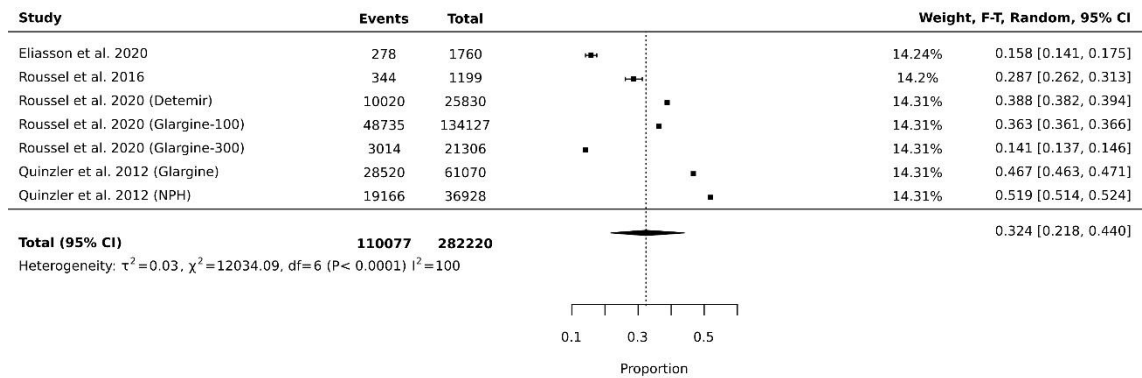

Figure S9: Forest plot for adherence of basal insulin treatment (MPR >80%)

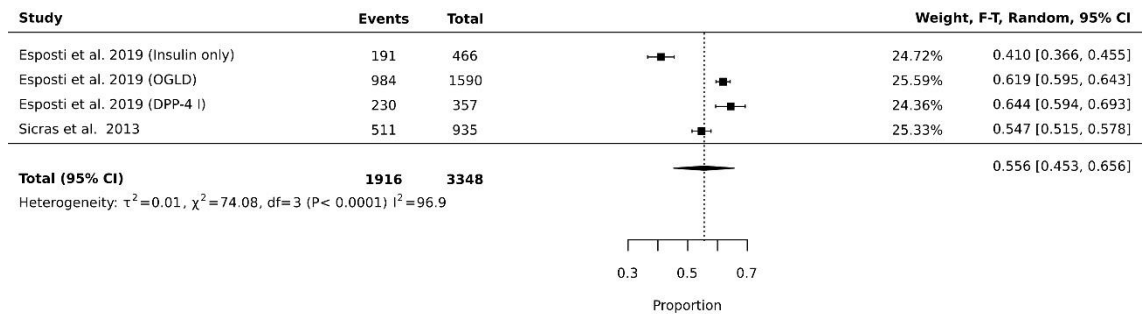

Figure S10: Forest plot for adherence of basal insulin treatment measured by MPR >80% (excluding Sicras et al. 2013)

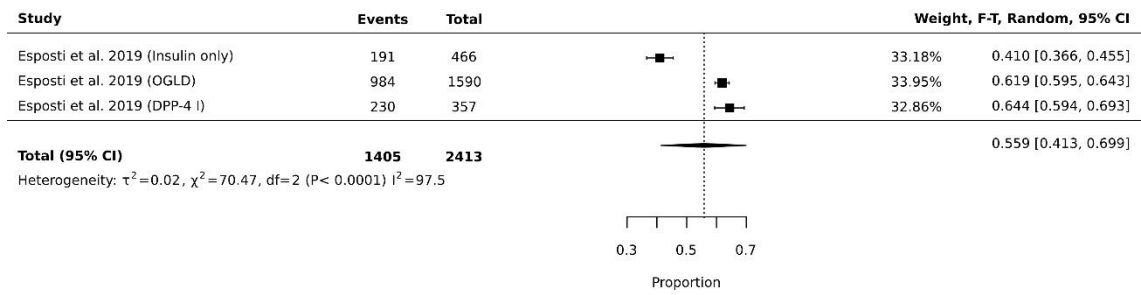

Supplement: MOESM1 [file 26896796]
